# Supplementary material
Source: PubMed Central journal article supplement (PMC6878172)
Supplement: NIHMS1538995-supplement-1.pdf [file NIHMS1538995-supplement-1.pdf]

Supplement Table 1: Common variant minor variant frequency (MVF) for White children in the PEER cohort not reported in Table 2.

| Name       | Position  | Allelic Change | MVF   |
|------------|-----------|----------------|-------|
| rs3806933  | 110406742 | C:T            | 0.404 |
| rs2289276  | 110407507 | C:T            | 0.269 |
| rs1898671  | 110408002 | C:T            | 0.350 |
| rs10062929 | 110408179 | C:A            | 0.138 |
| rs11466741 | 110408705 | C:T            | 0.274 |
| rs2289277  | 110409067 | C:G            | 0.412 |
| rs11466750 | 110412894 | G:A            | 0.140 |
| rs10073816 | 110413489 | G:A            | 0.421 |

Supplement Table 2: Common variant minor variant frequency (MVF) for children of African-Ancestry in the PEER cohort not reported in Table 2.

| Name       | Position  | Allelic Change | MVF   |
|------------|-----------|----------------|-------|
| rs3806933  | 110406742 | C:T            | 0.281 |
| rs2289276  | 110407507 | C:T            | 0.189 |
| rs11466740 | 110408673 | G:A            | 0.120 |
| rs11466741 | 110408705 | C:T            | 0.304 |
| rs2289277  | 110409067 | C:G            | 0.399 |
| rs2289278  | 110409148 | C:G            | 0.101 |
| rs11241090 | 110409666 | A:G            | 0.120 |
| rs11466744 | 110409966 | G:T            | 0.112 |
| rs10035870 | 110410864 | A:G            | 0.115 |
| rs11466749 | 110412585 | A:G            | 0.110 |
| rs11466750 | 110412894 | G:A            | 0.216 |
| rs10073816 | 110413489 | A:G            | 0.408 |

Supplement Table 3: Common variant minor variant frequency (MVF) reported by gender for children in the PEER cohort not reported in Table 2.

| Name       | Position  | Alleles | MVF-Male | MVF-Female |
|------------|-----------|---------|----------|------------|
| rs10073816 | 110413489 | A:G     | 0.499    | 0.500      |
| rs2289277  | 110409067 | C:G     | 0.414    | 0.407      |
| rs3806933  | 110406742 | C:T     | 0.365    | 0.346      |
| rs11466741 | 110408705 | C:T     | 0.298    | 0.282      |
| rs2289276  | 110407507 | C:T     | 0.254    | 0.223      |
| rs11466750 | 110412894 | G:A     | 0.165    | 0.184      |
| rs11466749 | 110412585 | A:G     | 0.140    | 0.138      |
| rs10062929 | 110408179 | C:A     | 0.115    | 0.123      |
